# Supplementary material for: Demonstration of protein-fragment complementation assay using purified firefly luciferase fragments
Source: PubMed Central journal article supplement (PMC3626928; doi:10.1186/1472-6750-13-31), 2013-03-28
Supplement: 1472-6750-13-31-S1.pdf [file 1472-6750-13-31-S1.pdf]

Fig. S1

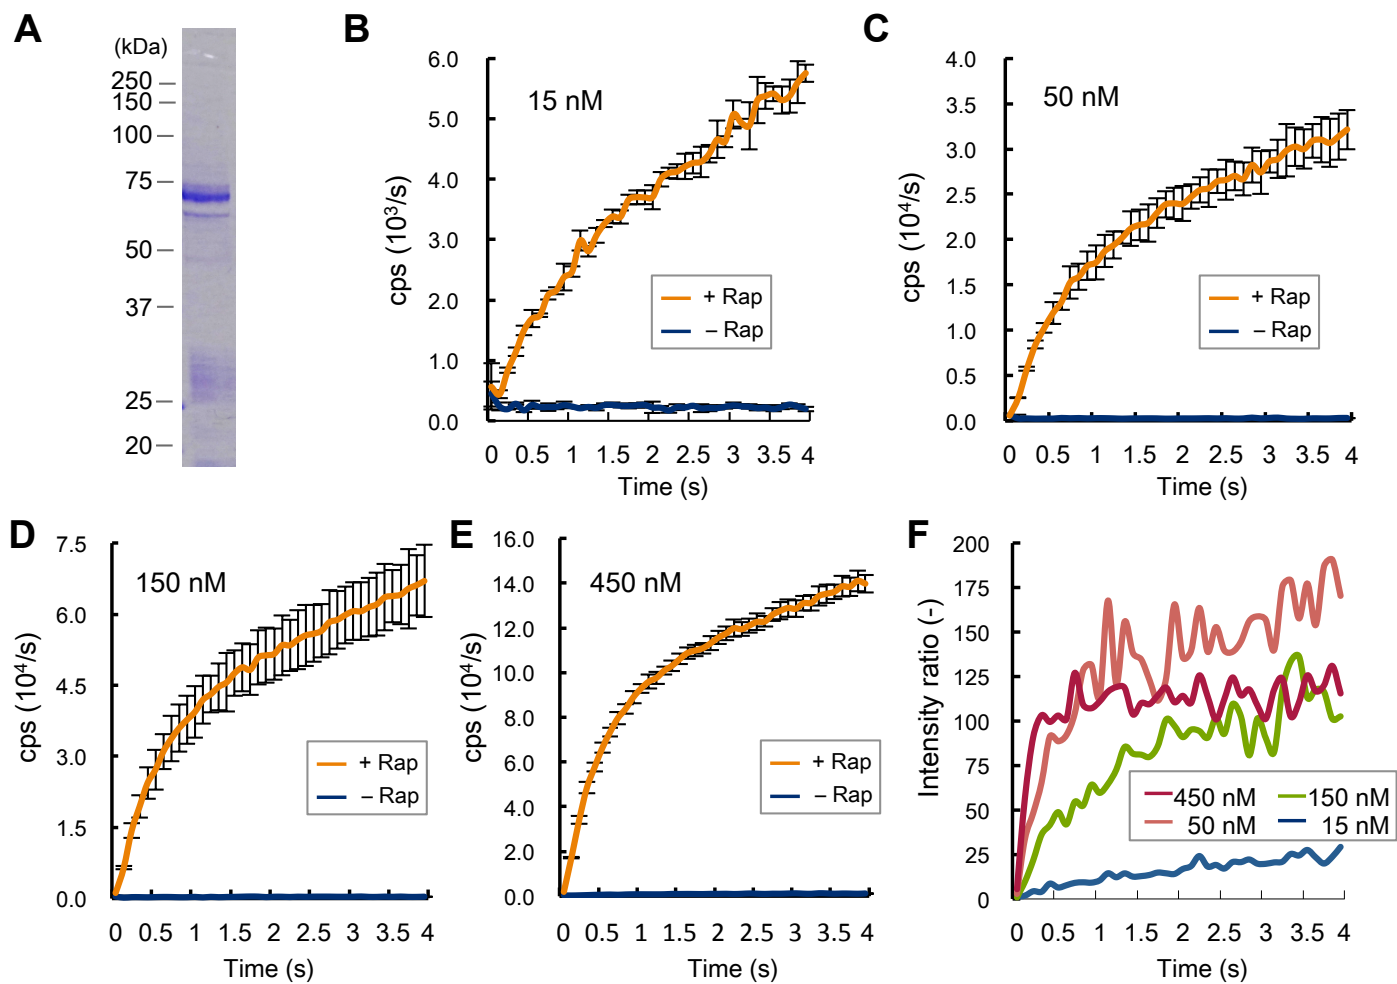

**Supplementary Figure S1 - Fluc PCA using a probe split at different site FRB/N (1-398)**

(A) SDS-PAGE of purified FRB/N (1-398). (B-E) Fluc PCA using FRB/N (1-398) and FKBP/C in 15, 50, 150, and 450 nM. (F) Signal/background ratios of Fluc PCA using FRB/N (1-398) and FKBP/C.
